# Supplementary material
Source: Springer Nature journal article supplement (https://www.springermedizin.de/resource/supplementary/12961_2012_276_MOESM5_ESM.pdf/9570944)

**In Thousand USD**

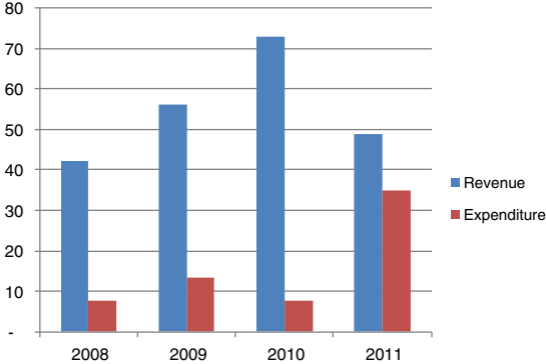

Supplement: MOESM5 [file 9570944]
